# Supplementary material for: Living with disabling chronic pain: results from a face-to-face cross-sectional population-based study
Source: PubMed Central journal article supplement — BMJ Open. 2018 Nov 12;8(11):e020913. doi: 10.1136/bmjopen-2017-020913 (PMC6252717; doi:10.1136/bmjopen-2017-020913), 2018-11-12
Supplement: bmjopen-2017-020913supp001.pdf [file bmjopen-2017-020913supp001.pdf]

Table 1 supplementary data. Distribution of the sample on sociodemographic variables<sup>a</sup>.

| Variables<br>(individuals with<br>missing data; %)      | Category (population aged ≥16 years;<br>total n=6,507)        | Percentage<br>(sample sizes) | 95% Confidence<br>Interval |         |
|---------------------------------------------------------|---------------------------------------------------------------|------------------------------|----------------------------|---------|
|                                                         |                                                               |                              | Minimum                    | Maximum |
| Sex (0)                                                 | Male                                                          | 49.3% (3209)                 | 48.1%                      | 50.5%   |
|                                                         | Female                                                        | 50.7% (3298)                 | 49.5%                      | 51.9%   |
| Age (0)                                                 | Aged 16-24 years                                              | 13.3% (867)                  | 12.5%                      | 14.2%   |
|                                                         | 25-44                                                         | 39.3% (2556)                 | 38.1%                      | 40.5%   |
|                                                         | 45-54                                                         | 16.7% (1087)                 | 15.8%                      | 17.6%   |
|                                                         | 55-64                                                         | 12.3% (799)                  | 11.5%                      | 13.1%   |
|                                                         | 65-74                                                         | 9.6% (626)                   | 8.9%                       | 10.4%   |
|                                                         | +75                                                           | 8.8% (572)                   | 8.1%                       | 9.5%    |
| Marital Status<br>(8, 0.1%)                             | Married                                                       | 59.6% (3805)                 | 58.4%                      | 60.8%   |
|                                                         | Single                                                        | 29.6% (1882)                 | 28.5%                      | 30.7%   |
|                                                         | Separated                                                     | 1.9% (123)                   | 1.6%                       | 2.2%    |
|                                                         | Divorced                                                      | 2.8% (178)                   | 2.4%                       | 3.2%    |
|                                                         | Widowed                                                       | 8% (511)                     | 7.4%                       | 8.7%    |
|                                                         | Cohabiting (66, 2.6%)                                         | 64.9% (4180)                 | 63.7%                      | 66%     |
| Social Class [27]<br>(1359, 20.9%)                      | I. Manager with 10<salariated staff                           | 5.3% (275)                   | 4.8%                       | 6%      |
|                                                         | II. Manager with 10>salariated staff                          | 7.5% (384)                   | 6.8%                       | 8.2%    |
|                                                         | IIIa. Administrative staff                                    | 12.7% (654)                  | 11.8%                      | 13.6%   |
|                                                         | IIIb. Self-employed                                           | 4.9% (253)                   | 4.4%                       | 5.5%    |
|                                                         | IIIc. Manual work supervisor                                  | 1.7% (87)                    | 1.4%                       | 2.1%    |
|                                                         | IVa. Qualified manual worker                                  | 23.6% (1216)                 | 22.5%                      | 24.8%   |
|                                                         | IVb. Manual worker                                            | 21.5% (1107)                 | 20.4%                      | 22.6%   |
|                                                         | V. Unskilled worker                                           | 22.8% (1170)                 | 21.7%                      | 23.9%   |
| Educational Level<br>(11, 0.2%)                         | VI. Others                                                    | 0.04% (2)                    | 0%                         | 0.2%    |
|                                                         | Illiterate                                                    | 2.1% (136)                   | 1.8%                       | 2.5%    |
|                                                         | No formal education but can read and write                    | 11.6% (756)                  | 10.9%                      | 12.4%   |
|                                                         | Up to 5 years primary schooling (Early education)             | 19.5% (1263)                 | 18.5%                      | 20.4%   |
|                                                         | Up to 8 years primary schooling                               | 23.8% (1543)                 | 22.7%                      | 24.8%   |
|                                                         | Up to 4 years secondary schooling (lower secondary)           | 9.1% (590)                   | 8.4%                       | 9.8%    |
|                                                         | First cycle of vocational training                            | 5.3% (345)                   | 4.8%                       | 5.9%    |
|                                                         | Second cycle of vocational training                           | 6.5% (420)                   | 5.9%                       | 7.1%    |
|                                                         | Up to 6 years secondary schooling (upper secondary)           | 9.1% (593)                   | 8.4%                       | 9.8%    |
| Employment<br>Situation (3, 0.05%)                      | Short-cycle tertiary education (diploma) or Bachelor's degree | 7.1% (465)                   | 6.6%                       | 7.8%    |
|                                                         | Master's degree or PhD                                        | 5.9% (385)                   | 5.4%                       | 6.5%    |
|                                                         | Employed                                                      | 34.1% (2221)                 | 33%                        | 35.3%   |
|                                                         | Unemployed but previously worked                              | 21.5% (1398)                 | 20.6%                      | 22.5%   |
|                                                         | Seeking first employment                                      | 1% (66)                      | 0.8%                       | 1.3%    |
|                                                         | Retired (previously employed)                                 | 14.4% (938)                  | 13.6%                      | 15.3%   |
|                                                         | Home keeper                                                   | 18.1% (1178)                 | 17.2%                      | 19.1%   |
|                                                         | Student                                                       | 8.1% (527)                   | 7.5%                       | 8.8%    |
|                                                         | Handicap/Permanent Disability                                 | 2.5% (160)                   | 2.1%                       | 2.9%    |
| Economic difficulty<br>to make ends meet<br>(30, 0.5 %) | Other                                                         | 0.2% (16)                    | 0.2%                       | 0.4%    |
|                                                         | Very difficult                                                | 12.7% (819)                  | 11.9%                      | 13.5%   |
|                                                         | Difficult                                                     | 18.4% (1190)                 | 17.5%                      | 19.3%   |
|                                                         | Somewhat difficult                                            | 30% (1944)                   | 28.9%                      | 31.1%   |
|                                                         | Somewhat easy                                                 | 25.5% (1651)                 | 24.4%                      | 26.5%   |
| Total net household<br>income (1540,<br>23.7%)          | Easy                                                          | 12.5% (813)                  | 11.8%                      | 13.4%   |
|                                                         | Very easy                                                     | 0.9% (60)                    | 0.7%                       | 1.2%    |
|                                                         | Up to 300 euros                                               | 0.7% (36)                    | 0.5%                       | 1%      |
|                                                         | From 301 to 499 euros                                         | 4.3% (212)                   | 3.7%                       | 4.9%    |
|                                                         | From 500 to 999 euros                                         | 27.6% (1368)                 | 26.3%                      | 28.8%   |
|                                                         | From 1000 to 1499 euros                                       | 37.6% (1866)                 | 36.2%                      | 38.9%   |
|                                                         | From 1500 to 1999 euros                                       | 17% (844)                    | 16%                        | 18.1%   |
|                                                         | From 2000 to 2499 euros                                       | 8.1% (401)                   | 7.3%                       | 8.9%    |
|                                                         | From 2500 to 2999 euros                                       | 3.2% (157)                   | 2.7%                       | 3.7%    |
| From 3000 to 4999 euros                                 | 1.5% (72)                                                     | 1.2%                         | 1.8%                       |         |
| More than 5000 euros                                    | 0.2% (11)                                                     | 0.1%                         | 0.4%                       |         |

<sup>a</sup> The sample design was not considered in this table
