# Supplementary material for: Living with disabling chronic pain: results from a face-to-face cross-sectional population-based study
Source: PubMed Central journal article supplement — BMJ Open. 2018 Nov 12;8(11):e020913. doi: 10.1136/bmjopen-2017-020913 (PMC6252717; doi:10.1136/bmjopen-2017-020913), 2018-11-12
Supplement: bmjopen-2017-020913supp002.pdf [file bmjopen-2017-020913supp002.pdf]

Table 2 supplementary data. Distribution of the sample on life habits variables<sup>a</sup>.

| Variables (missing responses; %)                                | Category (population aged +16; total n=6,507)              | Percentage (sample sizes) | 95% Confidence Interval |         |
|-----------------------------------------------------------------|------------------------------------------------------------|---------------------------|-------------------------|---------|
|                                                                 |                                                            |                           | Minimum                 | Maximum |
|                                                                 | Suspected alcoholism                                       | 3.1% (204)                | 2.7%                    | 3.6%    |
| Consumption of alcoholic beverages (2; 0.03%)                   | Yes, consumption of alcoholic beverage                     | 44.4% (2891)              | 43.2%                   | 45.6%   |
|                                                                 | Yes, but less than once a month                            | 13.3% (864)               | 12.5%                   | 14.1%   |
|                                                                 | No, no consumption of alcoholic beverage                   | 42.3% (2750)              | 41.1%                   | 43.5%   |
| Smoker (3; 0.05%)                                               | Yes, smoke daily                                           | 30.9% (2011)              | 29.8%                   | 32.1%   |
|                                                                 | Yes, smoke but not daily                                   | 2.4% (157)                | 2.1%                    | 2.8%    |
|                                                                 | Do not smoke but used to                                   | 17.5% (1137)              | 16.6%                   | 18.4%   |
|                                                                 | Do not smoke or have never regularly smoked                | 49.2% (3199)              | 48%                     | 50.4%   |
| Body Mass Index [30] (0)                                        | Low weight                                                 | 3.8% (247)                | 3.4%                    | 4.3%    |
|                                                                 | Normal weight                                              | 37.3% (2428)              | 36.1%                   | 38.5%   |
|                                                                 | Overweight                                                 | 39.7% (2585)              | 38.5%                   | 40.9%   |
|                                                                 | Obesity I                                                  | 17.1% (1113)              | 16.2%                   | 18%     |
|                                                                 | Obesity II                                                 | 2.1% (134)                | 1.7%                    | 2.4%    |
| Physical activity in the workplace or usual activity (47; 0.7%) | Sitting most of the workday                                | 30.4% (1964)              | 29.3%                   | 31.5%   |
|                                                                 | Standing most of the time without major movement or effort | 55.8% (3605)              | 54.6%                   | 57%     |
|                                                                 | Walking, carrying some weight. Frequent movement           | 11.5% (737)               | 10.7%                   | 12.2%   |
|                                                                 | Hard work, tasks requiring major physical effort           | 2.4% (154)                | 2%                      | 2.8%    |
| Physical exercise in free time (3; 0.05%)                       | No physical activity                                       | 26.8% (1742)              | 25.7%                   | 27.9%   |
|                                                                 | Occasional physical or sporting activity                   | 55.9% (3639)              | 54.7%                   | 57.1%   |
|                                                                 | Regular physical activity, several times a month           | 12% (779)                 | 11.2%                   | 12.8%   |
|                                                                 | Physical training several times a week                     | 5.3% (344)                | 4.8%                    | 5.9%    |
| Dairy product consumption (7; 0.1%)                             | Daily                                                      | 90.9% (5909)              | 90.2%                   | 91.6%   |
|                                                                 | Three or more times a week                                 | 2.9% (191)                | 2.6%                    | 3.4%    |
|                                                                 | One / two times a week                                     | 2.5% (163)                | 2.2%                    | 2.9%    |
|                                                                 | Less than 1 time week                                      | 0.8% (52)                 | 0.6%                    | 1%      |
|                                                                 | Never or almost never                                      | 2.8% (185)                | 2.5%                    | 3.3%    |
| Fresh fruit consumption (11; 0.2%)                              | Daily                                                      | 63.8% (4144)              | 62.6%                   | 64.9%   |
|                                                                 | Three or more times a week                                 | 21.7% (1405)              | 20.7%                   | 22.7%   |
|                                                                 | One / two times a week                                     | 9.6% (623)                | 8.9%                    | 10.3%   |
|                                                                 | Less than once a week                                      | 2.9% (190)                | 2.5%                    | 3.4%    |
|                                                                 | Never or almost never                                      | 2.1% (134)                | 1.8%                    | 2.4%    |
| Vegetables consumption (14; 0.2%)                               | Daily                                                      | 41% (2665)                | 39.9%                   | 42.1%   |
|                                                                 | Three or more times a week                                 | 34.1% (2211)              | 33%                     | 35.2%   |
|                                                                 | One / two times a week                                     | 19.8% (1287)              | 18.9%                   | 20.8%   |
|                                                                 | Less than once a week                                      | 3.7% (240)                | 3.3%                    | 4.2%    |
|                                                                 | Never or almost never                                      | 1.4% (90)                 | 1.1%                    | 1.7%    |
| Sweets consumption (30; 0.5%)                                   | Daily                                                      | 18.4(1191)                | 17.4%                   | 19.3%   |
|                                                                 | Three or more times a week                                 | 25.2% (1629)              | 24.2%                   | 26.2%   |
|                                                                 | One / two times a week                                     | 28% (1814)                | 27%                     | 29.1%   |
|                                                                 | Less than once a week                                      | 14% (908)                 | 13.2%                   | 14.9%   |
|                                                                 | Never or almost never                                      | 14.4% (935)               | 13.6%                   | 15.3%   |

<sup>a</sup> The sample design was not considered in this table
