# Supplementary material for: Living with disabling chronic pain: results from a face-to-face cross-sectional population-based study
Source: PubMed Central journal article supplement — BMJ Open. 2018 Nov 12;8(11):e020913. doi: 10.1136/bmjopen-2017-020913 (PMC6252717; doi:10.1136/bmjopen-2017-020913), 2018-11-12
Supplement: bmjopen-2017-020913supp003.pdf [file bmjopen-2017-020913supp003.pdf]

Table 3 supplementary. Prevalences of chronic pain and of other chronic diseases by sex, age and disabling condition.

| Variables                                                             |                            | Condition  |                            | Disabling Condition<br>(Subpopulation with the<br>condition/s) |                            | Disabling Condition<br>(Total population) |                            |           |
|-----------------------------------------------------------------------|----------------------------|------------|----------------------------|----------------------------------------------------------------|----------------------------|-------------------------------------------|----------------------------|-----------|
|                                                                       |                            | Prevalence | 95% Confidence<br>Interval | Prevalence <sup>b</sup>                                        | 95% Confidence<br>Interval | Prevalence <sup>c</sup>                   | 95% Confidence<br>Interval |           |
| Chronic<br>Pain <sup>a</sup>                                          | Total                      | 17.2%      | 16.3-18.12                 | 66.9%                                                          | 64.14-69.55                | 11.5%                                     | 10.73-12.28                |           |
|                                                                       | Sex<br>(p<0.001)           | Women      | 23.9%                      | 22.5-25.4                                                      | 68.2%                      | 64.9-71.3                                 | 16.3%                      | 15.1-17.6 |
|                                                                       |                            | Men        | 10.3%                      | 9.3-11.4                                                       | 63.9%                      | 58.6-68.8                                 | 6.6%                       | 5.8-7.5   |
|                                                                       | Age<br>groups<br>(p<0.001) | 16-44 yrs  | 11.4%                      | 10.4-12.5                                                      | 48.2%                      | 43.4-53.1                                 | 5.5%                       | 4.8-6.3   |
|                                                                       |                            | 45-64      | 18.2%                      | 16.5-20                                                        | 70.4%                      | 65.3-75                                   | 12.8%                      | 11.4-14.4 |
| +65                                                                   |                            | 32.3%      | 29.7-35                    | 82.7%                                                          | 78.6-86.1                  | 26.7%                                     | 24.2-29.2                  |           |
| At least<br>one<br>Chronic<br>Disease<br>(besides<br>Chronic<br>Pain) | Total                      | 45.9%      | 44.67-47.08                | 59.7%                                                          | 58-61.47                   | 29.5%                                     | 28.45-30.66                |           |
|                                                                       | Sex<br>(p<0.001)           | Women      | 52.9%                      | 51.2-54.6                                                      | 64.5%                      | 62.2-66.7                                 | 36.8%                      | 35.2-38.5 |
|                                                                       |                            | Men        | 38.6%                      | 37-40.3                                                        | 53.1%                      | 50.3-55.8                                 | 22.1%                      | 20.7-23.5 |
|                                                                       | Age<br>groups<br>(p<0.001) | 16-44 yrs  | 23.7%                      | 22.3-25.1                                                      | 43.3%                      | 40-46.7                                   | 13%                        | 11.9-14.2 |
|                                                                       |                            | 45-64      | 56.9%                      | 54.6-59.1                                                      | 56.6%                      | 53.6-59.5                                 | 34%                        | 31.9-36.2 |
| +65                                                                   |                            | 92.1%      | 90.4-93.5                  | 74.9%                                                          | 72.3-77.4                  | 69.7%                                     | 67.1-72.3                  |           |

<sup>a</sup> Chronic Pains: 'migraine/headache/chronic cephalalgia /frequent headache', 'angina/chest pain', 'back pain, neck pain, shoulder pain, waist pain, cervical/low back pain' or 'menstrual pain'.

<sup>b</sup> Percentage of disabling population within that population with the corresponding condition (chronic pain or at least one chronic disease).

<sup>c</sup> Percentage of population with both disabling and the corresponding condition (chronic pain or at least one chronic disease).
