# Supplementary material for: Living with disabling chronic pain: results from a face-to-face cross-sectional population-based study
Source: PubMed Central journal article supplement — BMJ Open. 2018 Nov 12;8(11):e020913. doi: 10.1136/bmjopen-2017-020913 (PMC6252717; doi:10.1136/bmjopen-2017-020913), 2018-11-12
Supplement: bmjopen-2017-020913supp004.pdf [file bmjopen-2017-020913supp004.pdf]

Table 4 supplementary data. Disabling chronic pain<sup>a</sup> prevalences according to the presence of other chronic diseases.

| Variables                  |            | POPULATION WITH OTHER CHRONIC DISEASES (total n=2987; n men=1,240; n women=1,747) |                         | POPULATION WITHOUT OTHER CHRONIC DISEASES (total n=3,520; n men=1969; n women=1,551) |                         |
|----------------------------|------------|-----------------------------------------------------------------------------------|-------------------------|--------------------------------------------------------------------------------------|-------------------------|
|                            |            | Prevalence <sup>b</sup> (Significance <sup>c</sup> )                              | 95% Confidence Interval | Prevalence <sup>b</sup> (Significance)                                               | 95% Confidence Interval |
| Disabling Chronic Pain     | Total      | 20.4%                                                                             | 19-21.9                 | 3.9%                                                                                 | 3.3-4.6                 |
|                            | Women      | 25.7% (p<0.001)                                                                   | 23.7-27.8               | 5.7% (p=0.042)                                                                       | 4.7-7.0                 |
|                            | Men        | 13.1%                                                                             | 11.3-15.0               | 2.5%                                                                                 | 1.9-3.3                 |
|                            | Ages 16-44 | 11.5%                                                                             | 9.5-13.8                | 3.0%                                                                                 | 2.4-3.7                 |
|                            | 45-64      | 19.3%                                                                             | 11.0-21.7               | 4.3%                                                                                 | 3.2-5.9                 |
|                            | +65        | 28.1% (p < 0.001)                                                                 | 25.6-30.9               | 9.5% (p=0.001)                                                                       | 5.0-17.2                |
| Non-disabling Chronic Pain | Total      | 6.9%                                                                              | 6-7.9                   | 4.7%                                                                                 | 4-5.7                   |
|                            | Women      | 8.0% (p<0.001)                                                                    | 6.8-9.3                 | 7.2% (p<0.001)                                                                       | 6.0-8.6                 |
|                            | Men        | 5.4%                                                                              | 4.3-6.8                 | 2.7%                                                                                 | 2.1-3.5                 |
|                            | Ages 16-44 | 9.4% (p < 0.001)                                                                  | 7.5-11.6                | 3.0%                                                                                 | 2.4-3.7                 |
|                            | 45-64      | 6.4%                                                                              | 5.1-8.0                 | 3.8%                                                                                 | 2.7-5.4                 |
|                            | +65        | 5.5%                                                                              | 4.3-7.1                 | 6.3%                                                                                 | 2.9-13.3                |

<sup>a</sup> Chronic Pains: 'migraine/headache/chronic cephalalgia /frequent headache', 'angina/chest pain', 'back pain, neck pain, shoulder pain, waist pain, cervical/low back pain' or 'menstrual pain'.

<sup>b</sup> Prevalence of disabling or non-disabling chronic pain within the population with or without other chronic diseases.

<sup>d</sup> p-values are located in the cells where there are statistical significant differences.
